# Supplementary material for: Safety and Efficacy of Tirofiban in Severe Ischemic Stroke Patients Undergoing Mechanical Thrombectomy
Source: MDPI journal article supplement (doi:10.3390/jcdd9110408), 2022-11-21
Supplement: s1 [file s1]

**Supplemental Table S1 Multivariate regression analysis for favorable outcome in the patients with tirofiban**

|                 | OR (95% CI)         | P      | aOR (95% CI)        | P      |
|-----------------|---------------------|--------|---------------------|--------|
| Age             | 0.977 (0.922~0.935) | 0.026* | 0.966 (0.915~0.980) | 0.034* |
| Stroke etiology | 0.909 (0.602~1.770) | 0.909  | 0.743 (0.543~1.987) | 0.548  |
| NIHSS           | 0.824 (0.705~0.963) | 0.015* | 0.853 (0.745~0.977) | 0.022* |
| ASPECTS         | 0.823 (0.614~0.834) | 0.034* | 0.745 (0.874~0.934) | 0.027* |
| OTP time        | 1.005 (0.990~1.020) | 0.500  | 1.000 (0.994~1.005) | 0.886  |
| OTR time        | 0.992 (0.970~0.991) | 0.030* | 0.966 (0.984~0.997) | 0.043* |
| TICI 2b-3       | 2.475 (0.753~1.386) | 0.067  | 1.859 (0.672~1.573) | 0.173  |

aOR, adjusted odds ratio; model adjusted by age, NIHSS, ASPECTS, stroke etiology, OTP time, OTR time, TICI 2b-3. CI, confidence interval; NIHSS, National Institutes of Health Stroke Scale; ASPECTS, Alberta Stroke Program Early Computed Tomography Score; OTP, time from onset to groin puncture; OTR time from onset to recanalization; TICI, Thrombolysis in Cerebral Infarction grading; \* statistically significant;

**Supplemental Table S2 Multivariate Regression Analysis for safety outcome**

|           | ICH               |        | SICH              |        | Death             |        |
|-----------|-------------------|--------|-------------------|--------|-------------------|--------|
|           | OR (95% CI)       | P      | OR (95% CI)       | P      | OR (95% CI)       | P      |
| age       | 1.01 (0.99~ 1.03) | 0.065  | 1.03 (1.00~ 1.06) | 0.030* | 1.04 (1.01~ 1.08) | 0.008* |
| NIHSS     | 1.05 (1.01~ 1.10) | 0.010* | 1.07 (1.02~ 1.12) | 0.002* | 1.09 (1.03~ 1.14) | 0.001* |
| ASPECTS   | 1.02 (0.94 ~1.44) | 0.052  | 1.03 (1.04~ 1.22) | 0.035* | 1.08 (1.04~1.09)  | 0.014* |
| tirofiban | 1.07 (0.55~ 2.06) | 0.835  | 1.16 (0.52~ 2.56) | 0.712  | 0.78 (0.30~ 2.02) | 0.611  |
| OTP time  | 1.00 (1.00~ 1.00) | 0.510  | 1.00 (1.00~ 1.00) | 0.265  | 1.00 (1.00~ 1.00) | 0.741  |
| OTR time  | 1.00 (1.00~ 1.00) | 0.738  | 1.00 (1.00~ 1.00) | 0.453  | 1.00 (1.00~ 1.00) | 0.824  |

OR, odds ratio; CI, confidence interval; NIHSS, National Institutes of Health Stroke Scale; ASPECTS, Alberta Stroke Program Early Computed Tomography Score; OTP, time from onset to groin puncture; OTR time from onset to recanalization; TICI, Thrombolysis in Cerebral Infarction grading; \* statistically significant;
